# Supplementary material
Source: PubMed Central journal article supplement (PMC5992093)
Supplement: NIHMS960717-supplement-Supplemental_Figures.pdf [file NIHMS960717-supplement-Supplemental_Figures.pdf]

In the format provided by the authors and unedited.

# HIV vaccine candidate activation of hypoxia and the inflammasome in CD14<sup>+</sup> monocytes is associated with a decreased risk of SIV<sub>mac251</sub> acquisition

Monica Vaccari<sup>1</sup>, Slim Fourati<sup>2</sup>, Shari N. Gordon<sup>1</sup>, Dallas R. Brown<sup>1</sup>, Massimiliano Bissa<sup>1</sup>, Luca Schifanella<sup>1</sup>, Isabela Silva de Castro<sup>1</sup>, Melvin N. Doster<sup>1</sup>, Veronica Galli<sup>1</sup>, Maria Omsland<sup>1</sup>, Dai Fujikawa<sup>1</sup>, Giacomo Gorini<sup>1</sup>, Namal P. M. Liyanage<sup>1</sup>, Hung V. Trinh<sup>3,4</sup>, Katherine M. McKinnon<sup>5</sup>, Kathryn E. Foulds<sup>6</sup>, Brandon F. Keele<sup>7</sup>, Mario Roederer<sup>6</sup>, Richard A. Koup<sup>6</sup>, Xiaoying Shen<sup>8</sup>, Georgia D. Tomaras<sup>8</sup>, Marcus P. Wong<sup>9</sup>, Karissa J. Munoz<sup>9</sup>, Johannes S. Gach<sup>9</sup>, Donald N. Forthal<sup>9</sup>, David C. Montefiori<sup>10</sup>, David J. Venzon<sup>11</sup>, Barbara K. Felber<sup>12</sup>, Margherita Rosati<sup>13</sup>, George N. Pavlakis<sup>13</sup>, Mangala Rao<sup>3</sup>, Rafick-Pierre Sekaly<sup>2</sup> and Genoveffa Franchini<sup>1\*</sup>

<sup>1</sup>Animal Models and Retroviral Vaccines Section, Vaccine Branch, Center for Cancer Research, National Cancer Institute, Bethesda, MD, USA. <sup>2</sup>Department of Pathology, Case Western Reserve University, Cleveland, OH, USA. <sup>3</sup>US Military HIV Research Program, Henry M. Jackson Foundation for the Advancement of Military Medicine, Bethesda, MD, USA. <sup>4</sup>US Military HIV Research Program, Walter Reed Army Institute of Research, Silver Spring, MD, USA. <sup>5</sup>Vaccine Branch, Center for Cancer Research, National Cancer Institute, Bethesda, MD, USA. <sup>6</sup>Vaccine Research Center, National Institute of Allergy and Infectious Diseases, National Institutes of Health, Bethesda, MD, USA. <sup>7</sup>AIDS and Cancer Virus Program, Leidos Biomedical Research Inc., Frederick National Laboratory, Frederick, MD, USA. <sup>8</sup>Duke Human Vaccine Institute, Duke University, Durham, NC, USA. <sup>9</sup>Division of Infectious Diseases, Department of Medicine, University of California, Irvine School of Medicine, Irvine, CA, USA. <sup>10</sup>Division of Surgical Sciences, Duke University School of Medicine, Durham, NC, USA. <sup>11</sup>Biostatistics and Data Management Section, Center for Cancer Research, National Cancer Institute, Bethesda, MD, USA. <sup>12</sup>Human Retrovirus Pathogenesis Section, Vaccine Branch, Center for Cancer Research, National Cancer Institute, Frederick, MD, USA. <sup>13</sup>Human Retrovirus Section, Vaccine Branch, Center for Cancer Research, National Cancer Institute, Frederick, MD, USA. \*e-mail: [franchig@mail.nih.gov](mailto:franchig@mail.nih.gov)

**Supplementary Figure 1. SIV<sub>mac251</sub> challenge outcome in vaccinated and control animals.** Survival curve of (a) 6 concurrent versus 35 historical controls, (b) Ad26-SIV versus 6 concurrent + 35 historical controls, (c) Ad26-SIV vaccinated animals versus 6 concurrent controls, (d) DNA-SIV versus 6 concurrent controls, and (e) Ad26-SIV and DNA-SIV vaccinated animals (logrank test). The study was not powered to compare vaccine strategies. (f) Number of transmitted variants in Ad26-SIV 9, (g) DNA-SIV and (h) concurrent controls. Each bar corresponds to each animal. (i) SIV RNA levels expressed as geometrical mean  $\pm$  standard error in plasma and (j) percent of CD4<sup>+</sup> T cell changes in the blood over time (mean  $\pm$  standard error) in animals that were infected after 10 x exposures to SIV<sub>mac251</sub> (12/12 in the Ad26 group, 10/12 in the DNA group).

**Supplementary Figure 2. Kinetic of monocytes in blood after different primes.** (a) Gating strategy to define monocytes subpopulation in blood. CD16 and CD14 are used to defined classical (CD14<sup>++</sup> CD16<sup>-</sup>), non-classical (CD14<sup>low</sup> CD16<sup>+</sup>), and intermediate (CD14<sup>++</sup> CD16<sup>+</sup>) monocytes within HLA-DR<sup>+</sup> cells. Classical monocytes express CCR2 and CXCR4 marker at higher levels than CD16<sup>+</sup> monocytes. (b) Frequency of monocytes defined as CD14<sup>+</sup> CD16<sup>+/-</sup> HLA-DR<sup>+</sup> in blood of macaques primed with Ad26 or (c) DNA before the challenge at 2 weeks from the prime (Ad26 = week 2; DNA = week 6), and at weeks 14 and 27. (d) Median  $\pm$  standard error is shown for the two groups. (e) Frequency of blood CD14<sup>+</sup> HLA-DR<sup>+</sup> cells, (f) non-classical and intermediate cells (CD16<sup>+</sup>). (g) Levels of plasma CCL2 measured after ALVAC-primed (n = 10), Ad26-primed (n = 12) or DNA-primed (n = 12) ALVAC-SIV + gp120 alum vaccine. The Kruskal-Wallis test corrected for multiple comparisons was used.

**Supplementary Figure 3. Identification of two monocytic signatures associated with a reduced risk versus an increased risk of SIV acquisition.** (a) Radial plot showing the relative contribution of immune subsets (m = myeloid; p = plasmacytoid; DC = dendritic cells) in protection against SIV acquisition for the four time points after boost investigated by transcriptomic analysis. The normalized enrichment score estimated by GSEA is plotted for each subset and separated by vaccine regimen (Ad26 – SIV, n = 11 animals; DNA – SIV, n = 12 animals). A normalized enrichment score (NES) > 0 or NES < 0 corresponds to markers of immune subsets enriched among genes associated with protection or SIV acquisition, respectively. GSEA two-tailed permutation test (fdr) was used to assess significance (sig) of the enrichments. (b) Boxplot showing that monocytes markers associated with protection identified in this study are expressed more in sorted classical monocytes than non-classical monocytes (subsets originated from n = 3 subjects). For each box on the plot, the median is indicated by a horizontal line, the box indicates the 1<sup>st</sup> and 3<sup>rd</sup> quartile of the values while the whiskers indicate the 1.5 interquartile range of the values. A two-tailed Student t-test was used to assess significance of the difference of expression between subsets. (c) NLP3 mRNA levels measured on PBMCs and sorted CD14<sup>-</sup> or CD14<sup>+</sup> cells in one non-vaccinated naïve macaque and one macaque in the DNA group (week 13) by RT-PCR.

**Supplementary Figure 4. CD16<sup>+</sup> monocytes and STAT-3 activation correlate with increased SIV<sub>mac251</sub> acquisition.** (a) Frequency of monocytes expressing the CD16 marker (n = 12) correlates with risk of SIV acquisition (Spearman correlation, two-tailed, 95% confidence). (b) Line plot showing the normalized average expression of monocyte genes associated to SIV acquisition in each macaque (y-axis) as a function of the four time points after boosting with ALVAC-SIV+ gp120 (x-axis). (c) Scatter plot showing the normalized average expression of monocyte genes associated to acquisition in each macaque at week 25 (y-axis) as a function of the fraction of non-classical monocytes (CD14<sup>-</sup> CD16<sup>+</sup>) among monocytes at week 27 (n = 12 animals). Linear regression fit (blue line) and its 95% confidence

interval (grey region) are given on the plot. **(d)** Network of the monocytes genes associated with acquisition of SIV of the DNA – SIV animals (n = 12 animals). The GeneMania inference method was used to identify co-expression, co-localization and common membership to canonical pathways (i.e. edges) between the monocyte genes (i.e. nodes). Each node is colored by the Pearson correlation of the genes (24h after the 2<sup>nd</sup> boost) with the number of SIV challenges to infection. **(e – g)** Phagocytic activity in serum after the last immunization measured in THP-1 cells, or in autologous cells (Ad26 group n = 12; DNA group n = 11).

**Supplementary Figure 5. Differences in specific T cell responses induced by the two strategies at week 27 in blood.** All vaccinated animals in the Ad26 group (n = 10) are in green circles, and those from the DNA (n = 9) are blue triangles. **(a)** IFN- $\gamma$ , **(b)** IL-2, and **(c)** TNF- $\alpha$  producing CD4<sup>+</sup> T cells after *gag* stimulation in blood at 2 weeks after the last immunization (week 27). **(d)** IFN- $\gamma$ , **(e)** IL-2, and **(f)** TNF- $\alpha$  producing CD8<sup>+</sup> T cells after *gag* stimulation in blood at 2 weeks after the last immunization (week 27). **(g)** IFN- $\gamma$ , **(h)** IL-2, and **(i)** TNF- $\alpha$  producing CD4<sup>+</sup> T cells after *env* stimulation in blood at 2 weeks after the last immunization (week 27). **(j)** IFN- $\gamma$  or **(k)** IL-2 and **(l)** TNF- $\alpha$  producing CD8<sup>+</sup> T cells after *env* stimulation in blood at 2 weeks after the last immunization (week 27). Each symbol represents one animal and the lines represent the medians (Ad26 group n = 10; DNA group n = 9). The Mann-Whitney-Wilcoxon nonparametric, two-tailed test was used to compare continuous factors between two groups.

**Supplementary Figure 6. T cell responses induced by the two strategies at week 25 in bronchoalveolar lavage (BAL).** **(a – e)** Responses in CD4<sup>+</sup> T cells, defined as CD3<sup>+</sup> and CD8<sup>-</sup>, and in **(f – j)** CD8<sup>+</sup> T cells (CD3<sup>+</sup> CD8<sup>+</sup> cells). Each symbol represents one animal and the lines represent the medians. The Mann-Whitney-Wilcoxon nonparametric, two-tailed test was used to compare continuous factors between two groups (Ad26 group n = 12; DNA group n = 12).

**Supplementary Figure 7. GATA3, key regulator factor of Th2 is increased in the DNA group after the prime.** **(a)** PBMCs from 4 animals per group, collected at week 10 were stained for CD4<sup>+</sup> T cell detection and T-bet, GATA3, Ror $\gamma$ t intracellular expression. Plots for all the animals are shown gated within total CD4<sup>+</sup> T cells. Boxplots representing the min to max of cells positive for T-bet, Gata3 or Ror $\gamma$ t within CD4<sup>+</sup> T Ki67<sup>+</sup> T cells at 10 weeks (prime) or at week 13 (prime + boost), in 4 animals per group. The Mann-Whitney-Wilcoxon nonparametric, two-tailed test was used.

**Supplementary Figure 8. Gating strategies for CD4<sup>+</sup> T cells and mucosal NKs.** **(a)** Representative flow plot showing the gating strategy for measuring subsets of CD4<sup>+</sup> T helper cells or circulating T follicular helper cells (Tfh) in blood. Cells were gated on live and on Ki67<sup>+</sup> and CD95<sup>+</sup> cells or on CXCR5<sup>+</sup> Ki67<sup>+</sup> cells. CXCR3 and CCR6 were used to discriminate between Th1 (CXCR3<sup>+</sup> CCR6<sup>-</sup>), Th2 (CXCR3<sup>-</sup> CCR6<sup>-</sup>), and Th17 (CXCR3<sup>-</sup> CCR6<sup>+</sup>) cells. **(b)** NKp44<sup>+</sup> cell measurement and mucosal recruitment. **(c)** Representative flow plot showing the gating strategy for measuring NKp44<sup>+</sup> or NKG2A<sup>+</sup> cells in the rectal mucosa. Mucosal NK cells were gated on live lymphocytes, which were negative for CD20 and CD3 and further classified based on the expression of NKG2A and NKp44 surface markers. **(c)** Frequency of NKp44<sup>+</sup> cells recruited at the mucosal site after ALVAC-primed (n = 27), Ad26-primed (n = 12), or DNA-primed (n = 11) ALVAC-SIV + gp120 alum vaccine and physiological levels in non-vaccinated controls (cntr). The Kruskal-Wallis test (nonparametric ANOVA) corrected for multiple comparisons was used.

**Supplementary Figure 9. Differences in the antibodies responses induced by the two strategies at week 25 in plasma.** All vaccinated animals in the Ad26 group are in green circles, and those from the DNA are blue triangles. Mann-Whitney test was used. **(a)** IgG and **(b)** IgA titers in serum against the gp130 of SIV<sub>mac251</sub> and **(c)** the gp140 of SIV<sub>smE660</sub>. **(d)** Serum IgG titers to the gp70-V1/V2 scaffold of SIV<sub>mac251</sub>. **(e)** Neutralizing antibodies to Tier1 SIV<sub>mac251.6</sub>. **(f)** Specific activity of rectal IgG binding antibodies to the gp130 of SIV<sub>mac251</sub> **(g)** and the gp140 SIV<sub>smE660</sub>. **(h)** Specific activity of IgA and **(i)** IgG binding antibodies to the gp70-V1/V2 scaffold of SIV<sub>mac251.6</sub>. **(j)** Mucosal IgG and **(k)** IgA responses to cyclic V2 measured as specific activity at week 25. Each symbol represents one animal and the lines represent the medians. The Mann-Whitney-Wilcoxon nonparametric, two-tailed test was used to compare continuous factors between two groups (Ad26 group n = 12; DNA group n = 12).

**Supplementary Table 1: Cytokine production in rectal mucosa of the Ad26 and DNA prime groups at one week following the first (week 13) and last (week 25) ALVAC-SIV/gp120 alum.** Cytokine production (ng/ml) from rectal mucosa cells collected with or without Env stimulation at week 13 (n = 7 Ad26; n = 7 DNA) and week 25 (n = 9 Ad26; n = 12 DNA). The Wilcoxon nonparametric, two-tailed test was used.

**Supplementary Table 2. Genes associated with protection from SIV<sub>mac251</sub> acquisition.** **(a)** List of genes expressed differently between Ad26 (n = 12 animals) and DNA (n = 12 animals) primed animals using LIMMA two-tailed moderated t-test adjusted for multiple comparisons using the Benjamini-Hochberg correction. **(b)** List of genes correlated to the number of SIV challenge to acquisition using LIMMA two-tailed moderated t-test adjusted for multiple comparisons using the Benjamini-Hochberg correction. **(c)** List of pathways associated with SIV challenge to infection using GSEA two-tailed permutation test. **(d)** Monocyte genes associated with SIV challenge to infection.

**Supplementary Table 3. Immune markers associated with the risk of SIV<sub>mac251</sub> acquisition.** **(a)** Full list of immune markers investigated (Dataset: type of experiment, Marker: immune marker measured). **(b)** List of markers significantly different between Ad26 (n = 11 animals) and DNA (n = 12 animals) groups using a Wilcoxon non-parametric, two-tailed test (p) adjusted for multiple comparisons using the Benjamini-Hochberg correction (adj.p). Difference of location column indicates the difference between the median expression in the Ad26 and DNA group. **(c)** Immune markers associated with SIV challenge to infection in a univariate analysis Spearman correlation (rho) and two-tailed Student *t*-test (p) adjusted for multiple comparisons using the Benjamini-Hochberg correction (adj.p). **(d)** Multivariate model associated with SIV challenge to infection using a two-tailed ANOVA *F*-test. The column reg. coef indicates the regression coefficient of the markers in the multivariate expression model.

**Supplementary Table 4: Differentially expressed genes in the Ad26 and DNA primed animals.** Differentially expressed genes in the Ad26 (n=11 animals) and DNA (n=12 animals) primed animals part of the NLRP3, HIF1a and IL10-STAT3 pathways. LIMMA two-tailed moderated t-test was used to assess significance of the differential expression.

**Supplementary Table 5: SIV-specific adaptive B and T cell responses in the Ad26 prime and DNA prime groups at the end of the immunization regimen (week 27).** Representations of these data can be found in Supplementary Figure 9.

**Supplementary Table 6. Table summarizing cytokine and chemokine plasma levels following Ad26 and ALVAC prime at 24h, adapted from Ref. 41, 42.**

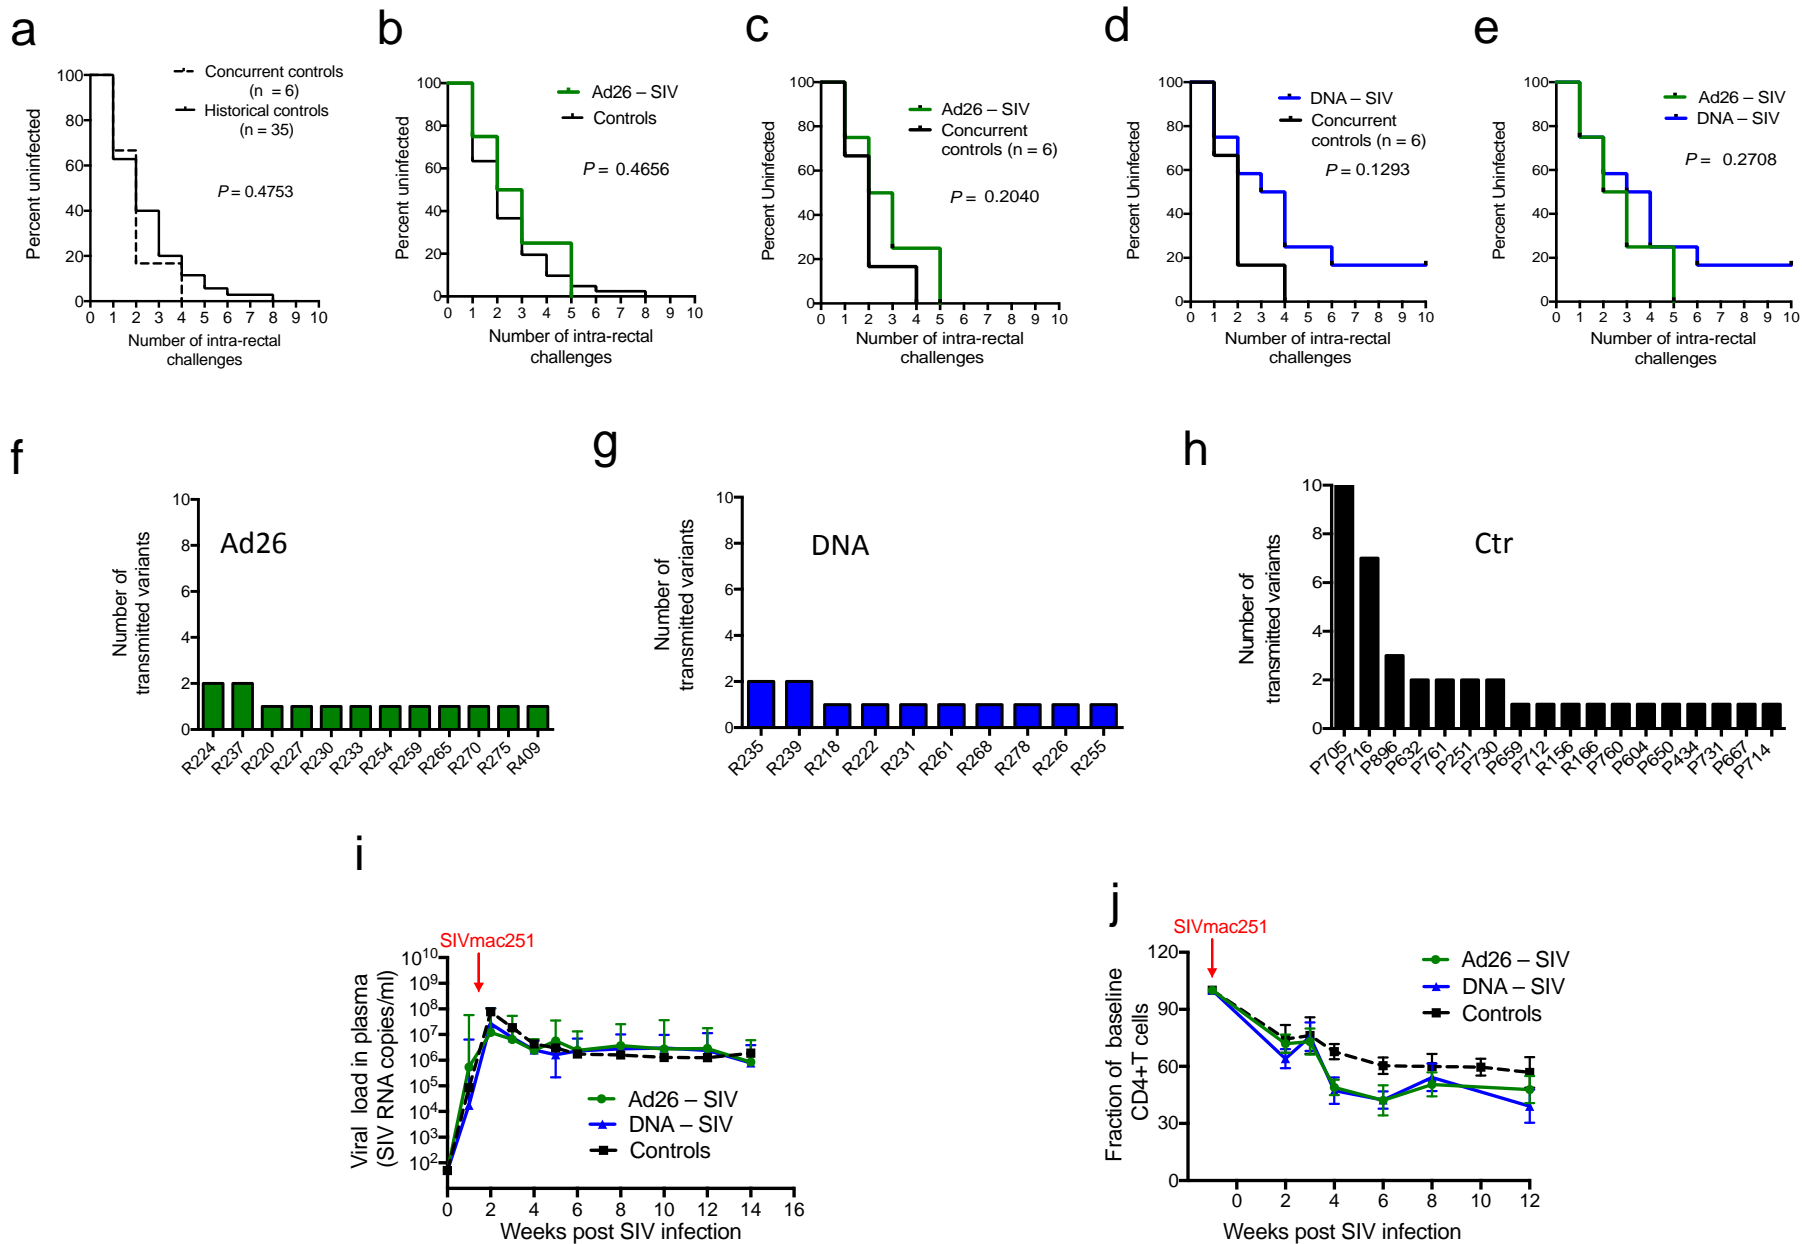

Supplementary Figure 1

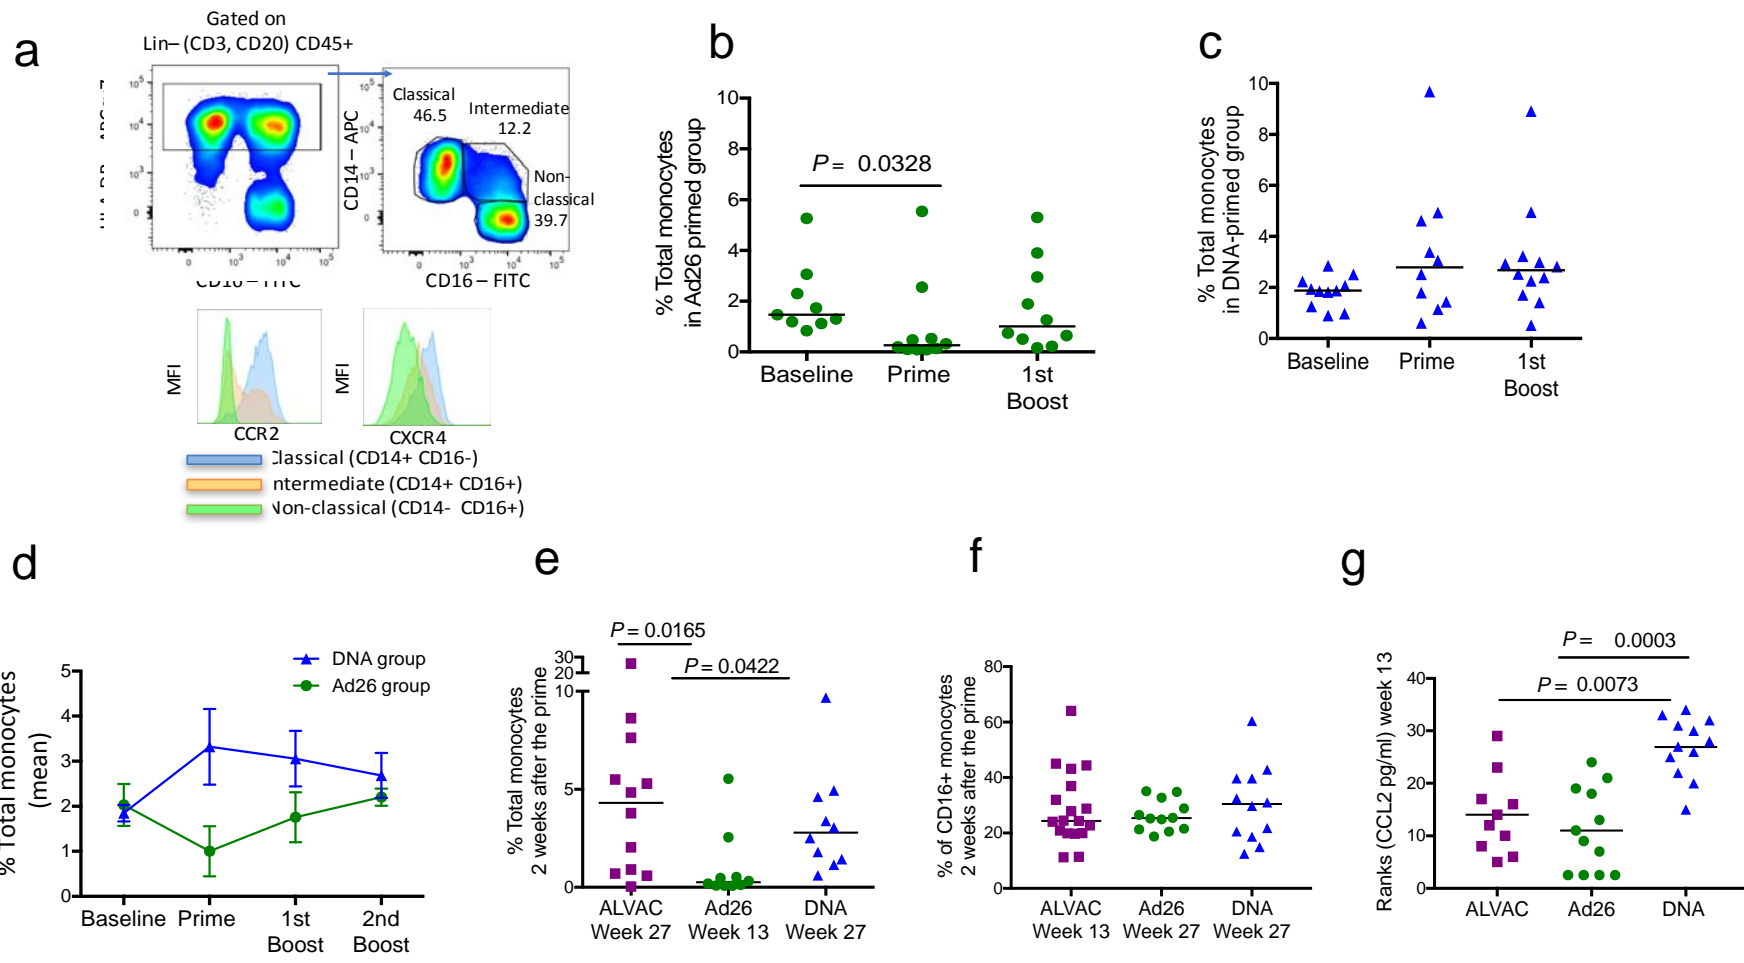

Supplementary Figure 2

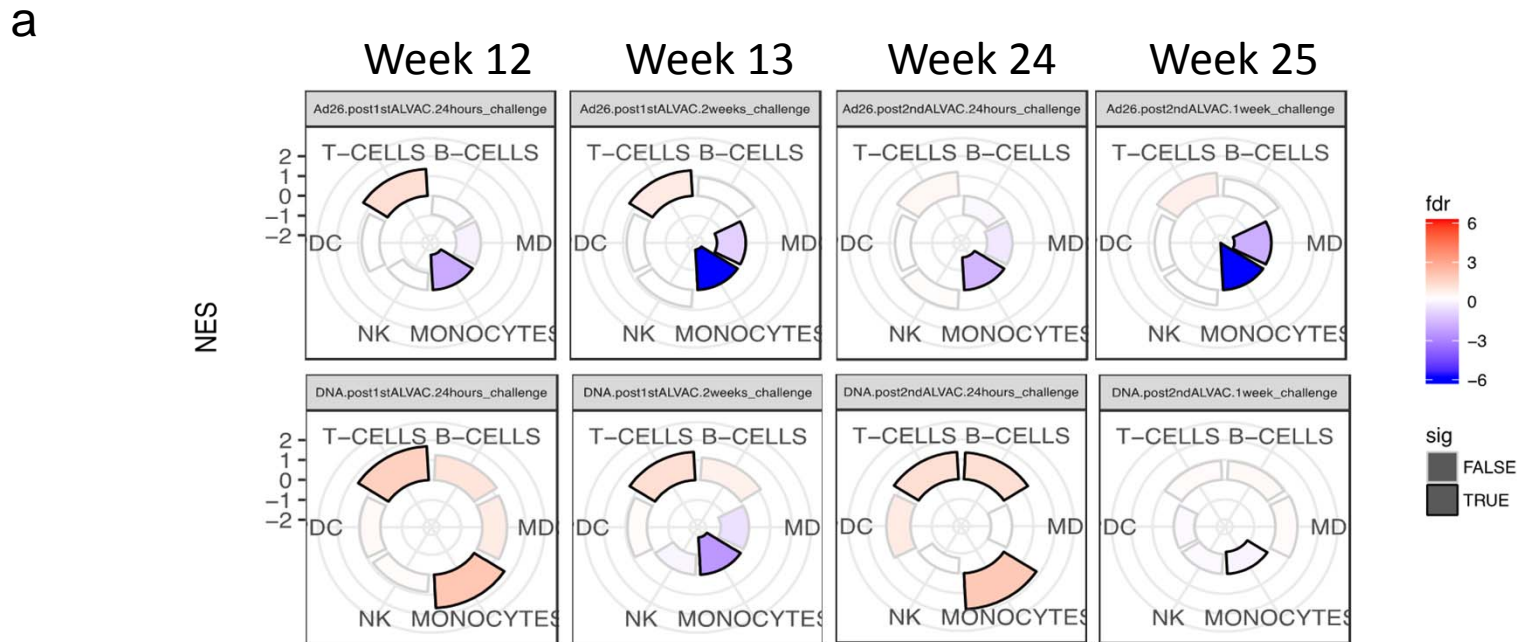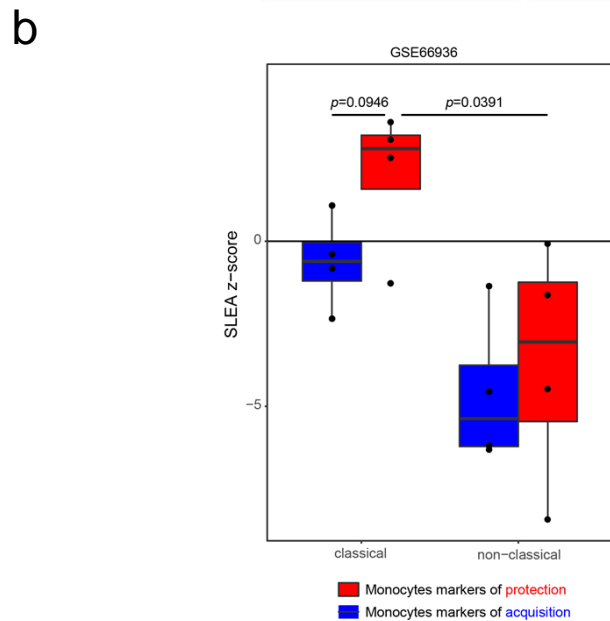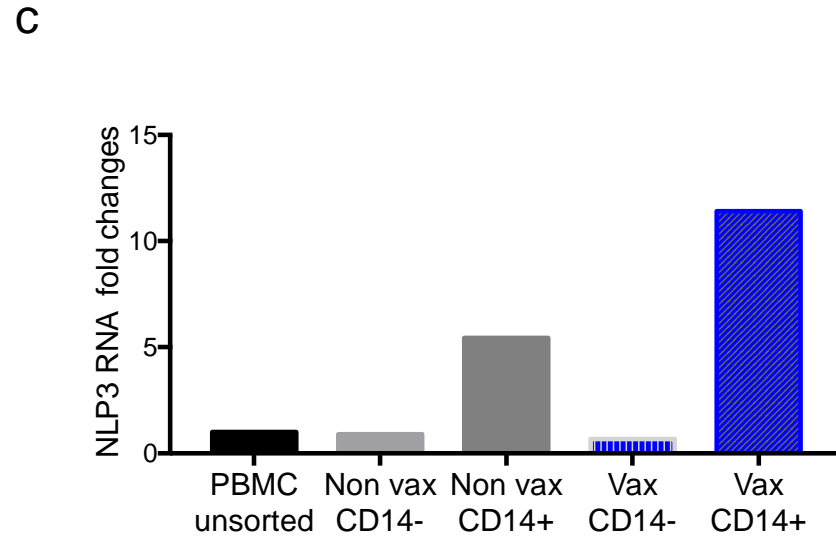

Supplementary Figure 3



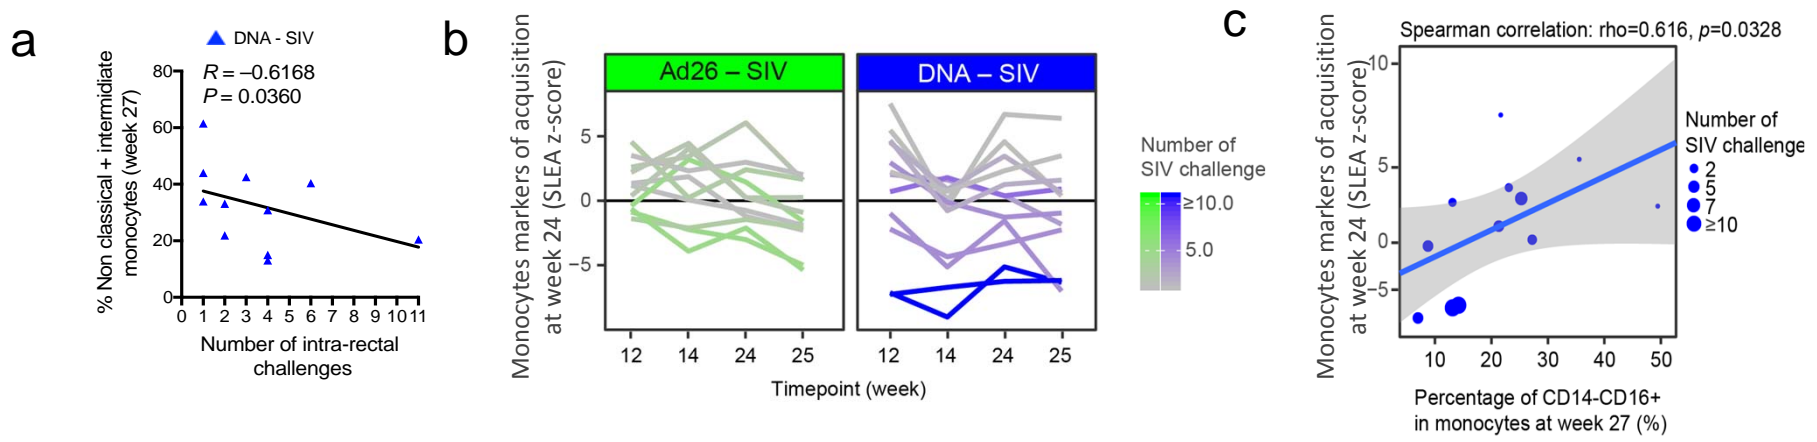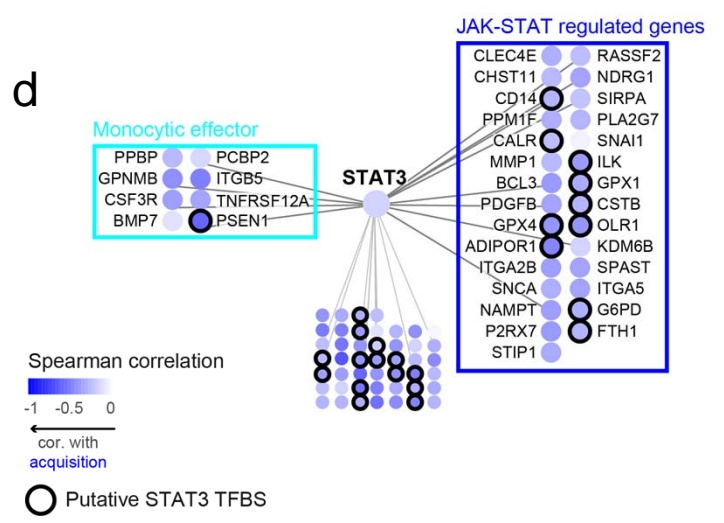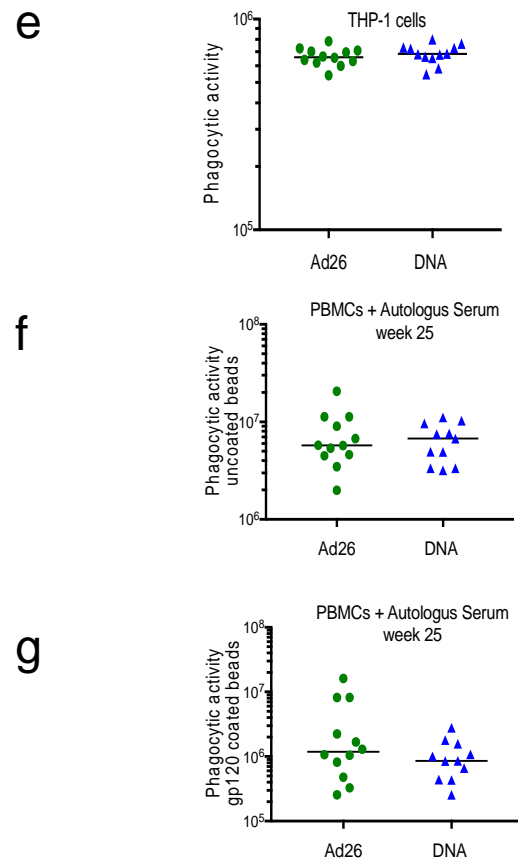

Supplementary Figure 4

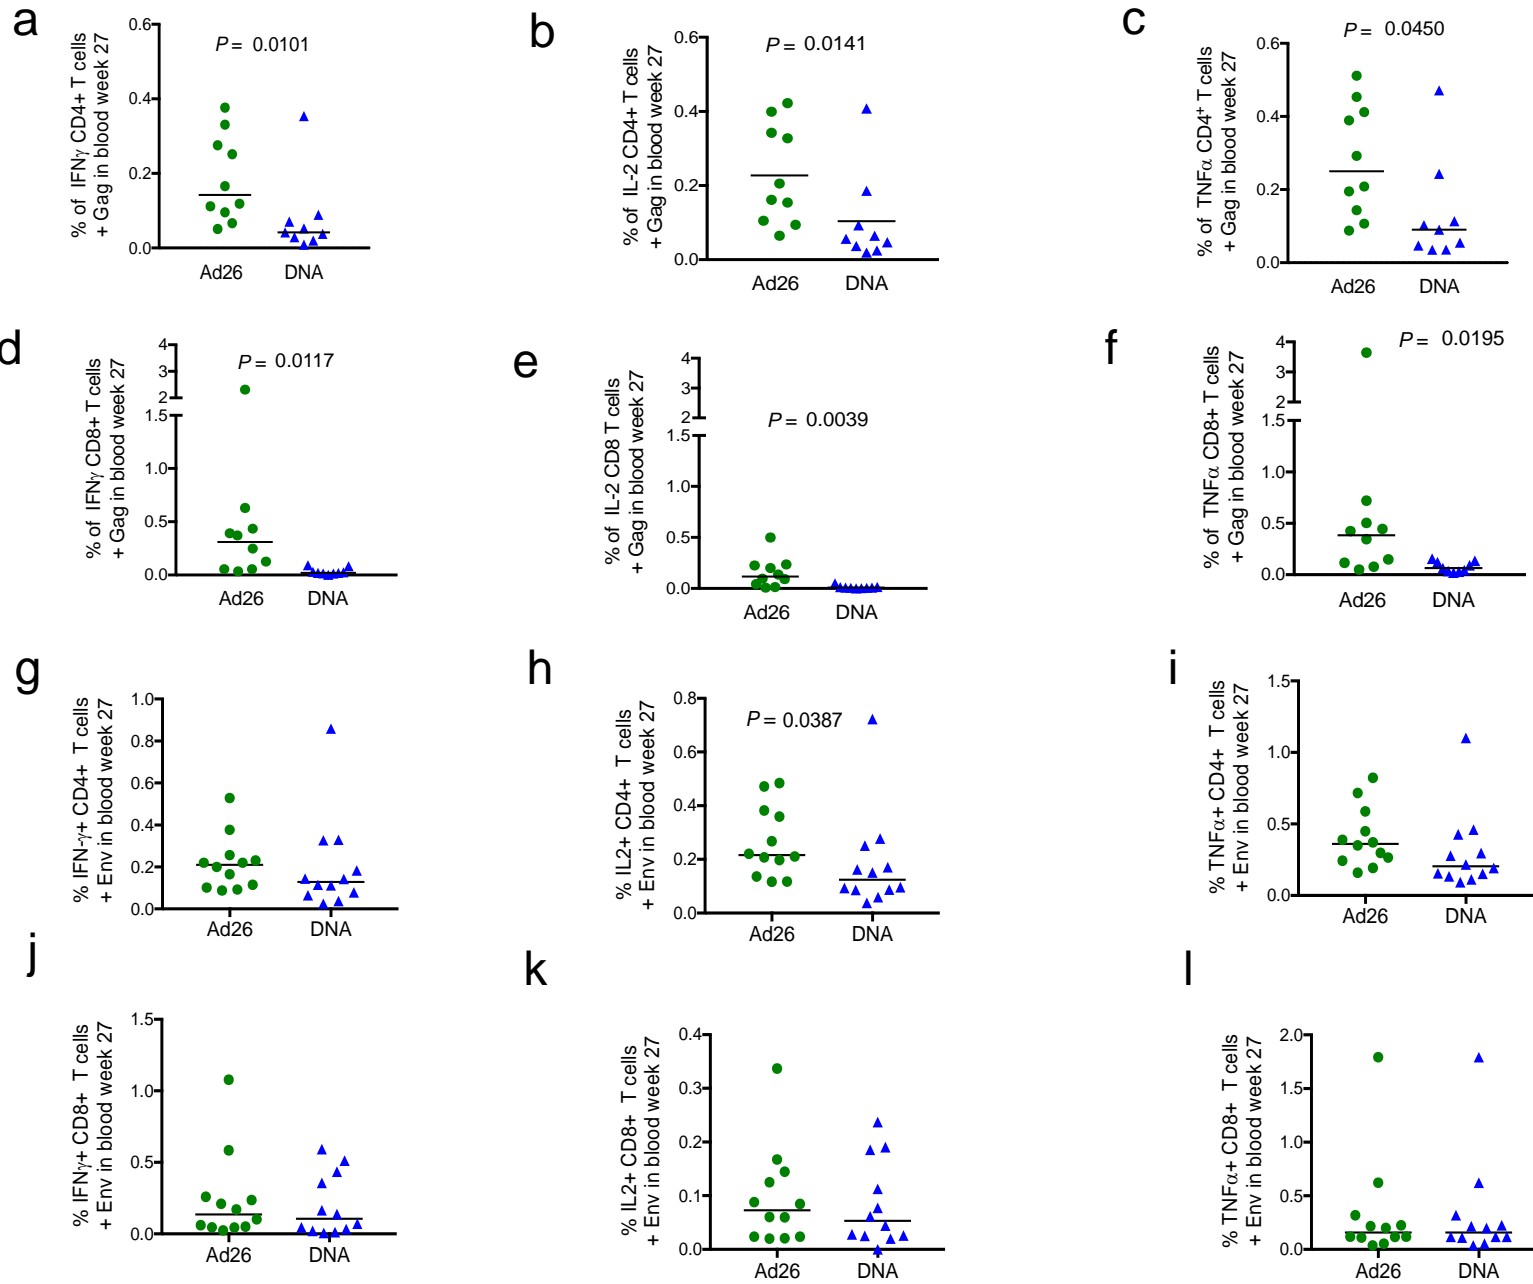

Supplementary Figure 5

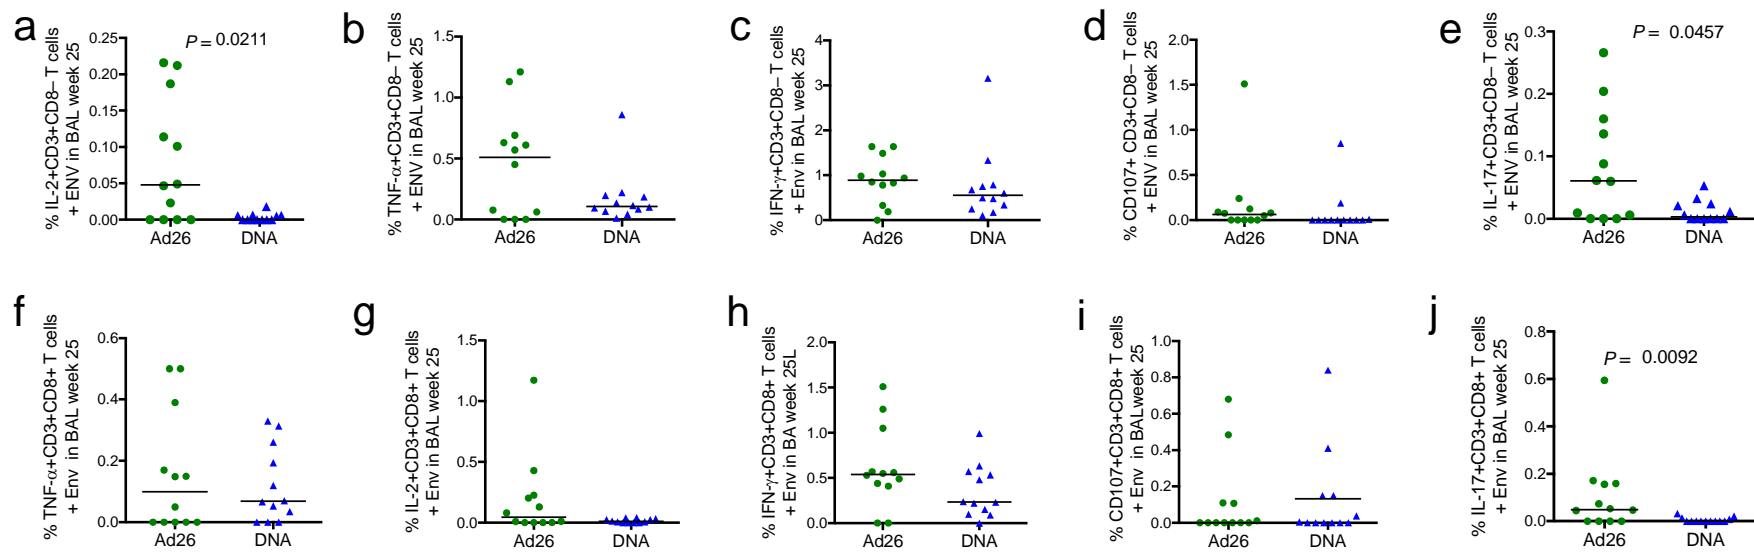

Supplementary Figure 6

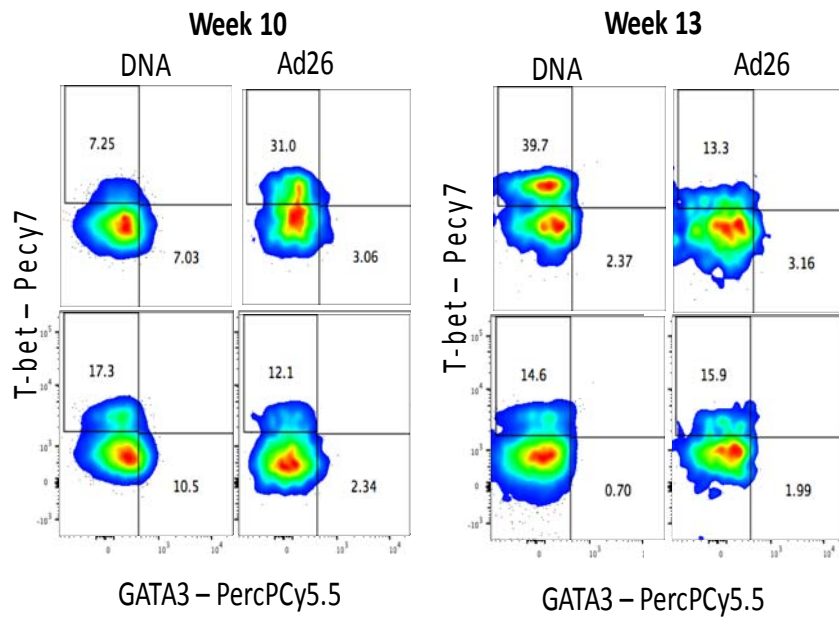

Week 10,  
1 week before 1<sup>st</sup> boost

Week 13,  
1 week after 1<sup>st</sup> boost

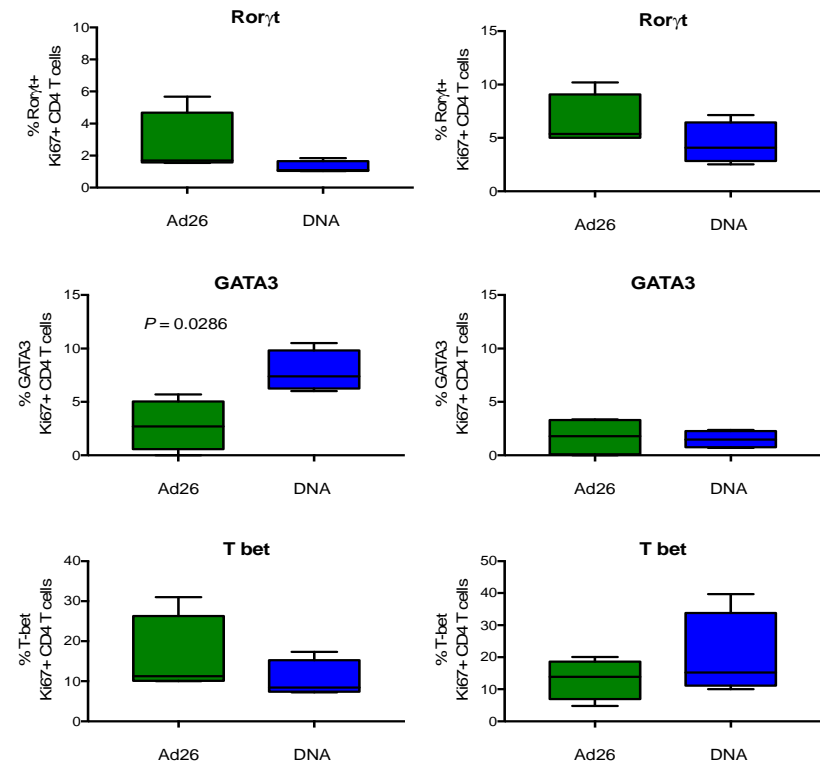

Supplementary Figure 7

a

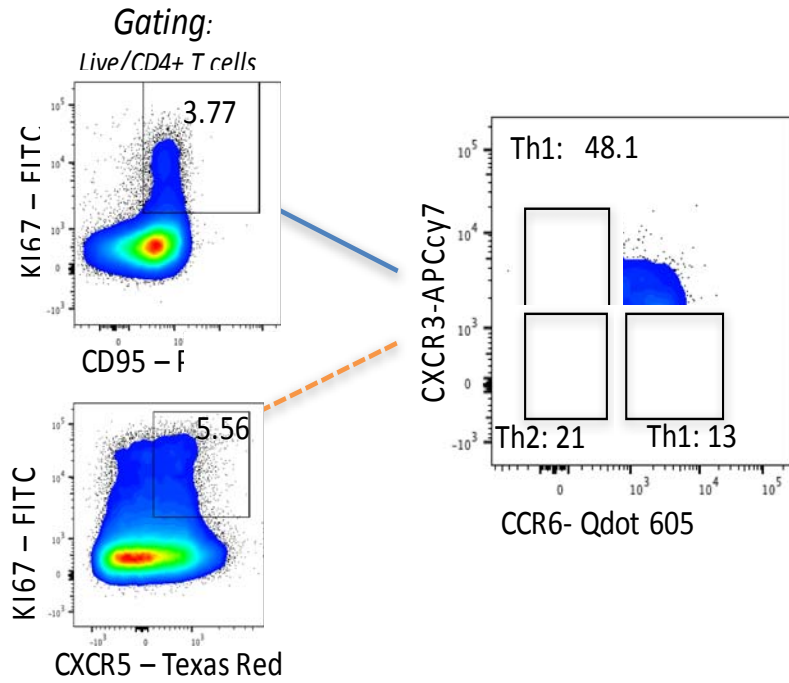

Supplementary Figure 8

b

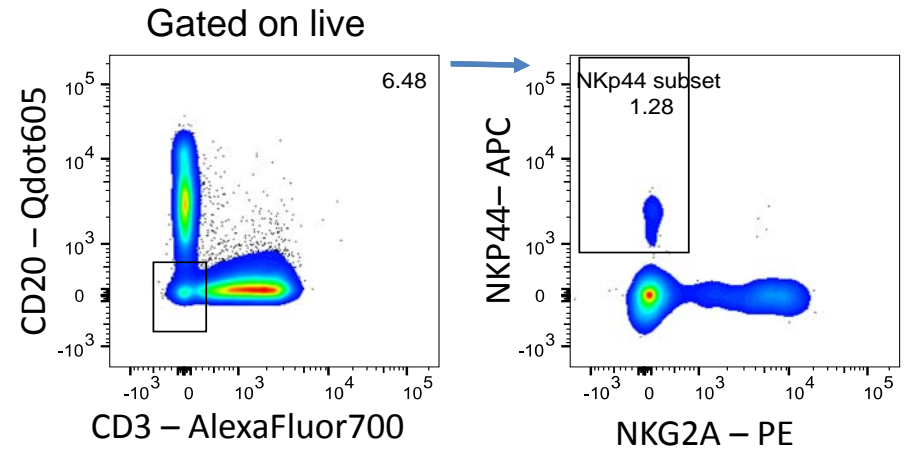

c

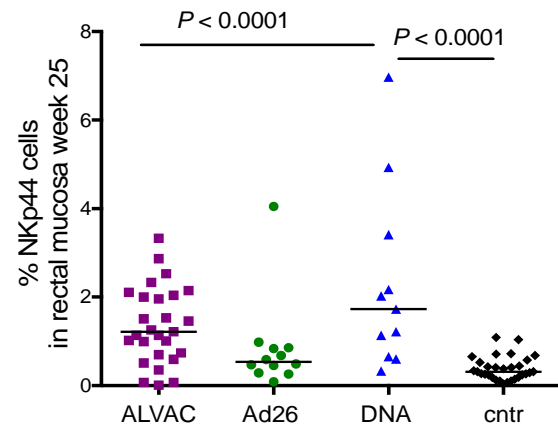

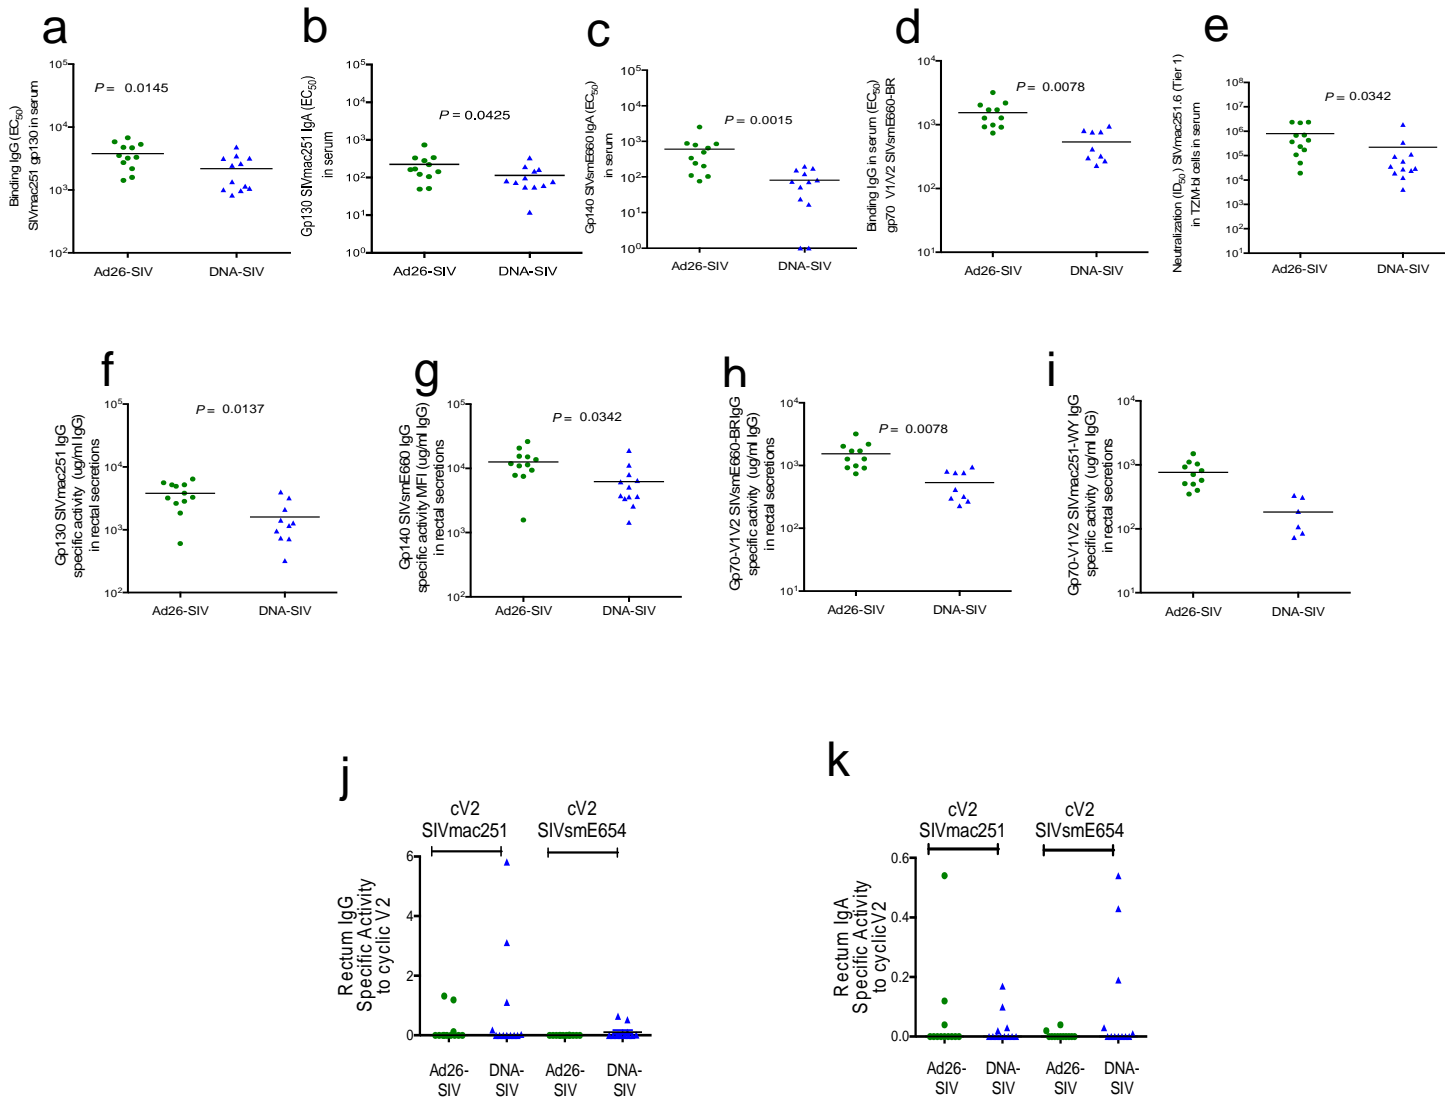

Supplementary Figure 9

|        | Wk 13 unstim |            |                  | Wk 13 Env   |            |                  | Wk 25 unstim |            |                  | Wk 25 Env   |            |                  |
|--------|--------------|------------|------------------|-------------|------------|------------------|--------------|------------|------------------|-------------|------------|------------------|
|        | Ad26 median  | DNA median | Mann Whitney P = | Ad26 median | DNA median | Mann Whitney P = | Ad26 median  | DNA median | Mann Whitney P = | Ad26 median | DNA median | Mann Whitney P = |
| IL-1b  | 21.5         | 6.25       | 0.0012           | 19          | 8          | 0.0484           | 60           | 78         | 0.9852           | 55          | 56.5       | 0.9028           |
| IL-2   | 17           | 2.5        | 0.0064           | 17          | 3.5        | 0.0472           | 17           | 16         | 0.5622           | 14          | 10         | 0.1739           |
| IL-4   | 10.5         | 6.5        | 0.0676           | 14.5        | 6.5        | 0.2593           | 11           | 15         | 0.9555           | 9           | 9.5        | 0.9878           |
| IL-6   | 258          | 49.5       | 0.0379           | 401         | 91.5       | 0.1527           | 359.5        | 587        | 0.5383           | 382.5       | 365.5      | 0.8078           |
| IL-8   | 7752         | 1448.5     | 0.0041           | 8306        | 1536.5     | 0.0175           | 4107         | 3862       | 0.4119           | 4856        | 3229.25    | <u>0.0585</u>    |
| IL-10  | 32.8         | 3.8        | 0.007            | 34.8        | 11.8       | 0.0152           | 15           | 28         | 0.3598           | 25.5        | 25         | 0.917            |
| IL-13  | 10.5         | 3.5        | 0.0047           | 20.5        | 4.5        | 0.1294           | 16.5         | 15.5       | 0.6682           | 17          | 17.5       | 0.4963           |
| IL-17a | 41.8         | 20.3       | 0.2086           | 34.8        | 22.3       | 0.1544           | 34           | 21         | 0.3215           | 31          | 36.5       | 0.7939           |
| CCL2   | 6996.3       | 444.3      | 0.0023           | 6089.3      | 596.3      | 0.0041           | 5211         | 5967.5     | 0.5027           | 5258        | 4383       | 0.2773           |
| CCL3   | 37           | 24         | 0.0262           | 27          | 19         | 0.1206           | 57.5         | 56         | 0.8396           | 46.5        | 40         | 0.716            |
| IFN-g  | 27.5         | 3          | 0.0177           | 21.5        | 6.5        | <u>0.0657</u>    | 25           | 14         | <u>0.0587</u>    | 21.5        | 19.5       | 0.4963           |
| CCL5   | 20           | 13         | 0.1055           | 19          | 13         | 0.4292           | 20           | 19         | 0.5511           | 18          | 28         | <u>0.0829</u>    |
| IL-23  | 4.5          | 3.5        | 0.9213           | 37.5        | 3.5        | 0.014            | 1.5          | 1.25       | 0.76             | 14          | 6          | 0.1502           |
| IL-22  | 0.75         | -5.3       | <u>0.0928</u>    | 7.3         | 2.3        | <u>0.0954</u>    | -0.25        | 5.55       | 0.396            | -0.3        | 0          | 0.5627           |
| IL-21  | 7            | 3.5        | <u>0.0873</u>    | 5.5         | 3.5        | 0.4211           | 4            | 5.25       | 0.7634           | 3.5         | 5.5        | 0.6946           |
| TGF-b  | 2336         | 2393.5     | 0.9623           | 2591.5      | 2173.5     | 0.0002           | 2848.5       | 2635.5     | 0.1754           | 2689        | 2728.5     | 0.6556           |
| TGF-b2 | 1149.25      | 1118.5     | 0.7396           | 1216.25     | 1123       | 0.0431           | 1188.5       | 1215.5     | 0.9575           | 1207        | 1202       | 0.882            |
| TGF-b3 | 7.55         | 6.3        | 0.0341           | 8.3         | 4.8        | 0.004            | 8.3          | 7.8        | 0.1682           | 8.8         | 7.8        | 0.5606           |

Supplementary Table 1

|                    | Immunization                            |      |          | Challenge                |       |          | Function                                                       |
|--------------------|-----------------------------------------|------|----------|--------------------------|-------|----------|----------------------------------------------------------------|
|                    | Model Name                              | t    | p        | Model Name               | t     | p        |                                                                |
| NLRP3 inflammasome |                                         |      |          |                          |       |          |                                                                |
| NLRP3              | DNA.post1stALVAC.24hours-DNA.prevac     | 5.05 | 1.79E-06 | DNA.post1stALVAC.24hours | 1.71  | 0.107    |                                                                |
| NLRP3              |                                         |      |          | DNA.post1stALVAC.2weeks  | 1.46  | 0.163    |                                                                |
| NLRP3              | DNA.post2ndALVAC.24hours-DNA.prevac     | 6.61 | 1.46E-09 | DNA.post2ndALVAC.24hours | 3.22  | 0.00609  |                                                                |
| HSP90AB1           |                                         |      |          | DNA.post1stALVAC.24hours | 1.28  | 0.218    |                                                                |
| HSP90AB1           |                                         |      |          | DNA.post2ndALVAC.24hours | 1.27  | 0.224    |                                                                |
| CASP1              | DNA.post2ndALVAC.24hours-DNA.prevac.pre | 11.9 | 2.13E-21 | DNA.post2ndALVAC.24hours | 2.60  | 0.0210   |                                                                |
| IL1B               |                                         |      |          | DNA.post1stALVAC.24hours | 2.32  | 0.0345   |                                                                |
| HIF1 signaling     |                                         |      |          |                          |       |          |                                                                |
| HIF1A              | DNA.post1stALVAC.24hours-DNA.prevac.pre | 3.14 | 0.00220  | DNA.post1stALVAC.24hours | 3.33  | 0.00443  |                                                                |
| HIF1A              | DNA.post2ndALVAC.24hours-DNA.prevac.pre | 5.99 | 2.84E-08 | DNA.post2ndALVAC.24hours | 3.20  | 0.00637  |                                                                |
| HIF1A              | DNA.post2ndALVAC.1week-DNA.prevac.pre   | 1.99 | 0.0489   | DNA.post2ndALVAC.1week   | 2.07  | 0.0566   |                                                                |
| HIF1AN             |                                         |      |          | DNA.post1stALVAC.2weeks  | -1.58 | 0.133    | HIF1 inhibitor                                                 |
| PPP1R12A           |                                         |      |          | DNA.post1stALVAC.24hours | 3.68  | 0.00213  | HIF1 activator                                                 |
| PPP1R12A           |                                         |      |          | DNA.post1stALVAC.2weeks  | 1.21  | 0.245    | HIF1 activator                                                 |
| PPP1R12A           | DNA.post2ndALVAC.24hours-DNA.prevac.pre | 4.53 | 1.52E-05 | DNA.post2ndALVAC.24hours | 3.41  | 0.00422  | HIF1 activator                                                 |
| ARNT2              |                                         |      |          | DNA.post1stALVAC.2weeks  | 1.36  | 0.192    | cofactor of HIF1A                                              |
| IL10-STAT3         |                                         |      |          |                          |       |          |                                                                |
| STAT3              |                                         |      |          | DNA.post1stALVAC.24hours | -1.63 | 0.124    |                                                                |
| STAT3              |                                         |      |          | DNA.post1stALVAC.2weeks  | -3.59 | 0.00239  |                                                                |
| TNFRSF1A           |                                         |      |          | DNA.post1stALVAC.24hours | -1.43 | 0.174    | IL10 positively regulates extracellular inflammatory mediators |
| TNFRSF1A           |                                         |      |          | DNA.post1stALVAC.2weeks  | -4.31 | 0.000506 | IL10 positively regulates extracellular inflammatory mediators |
| TNFRSF1A           |                                         |      |          | DNA.post2ndALVAC.1week   | -1.95 | 0.0715   | IL10 positively regulates extracellular inflammatory mediators |
| TIMP1              |                                         |      |          | DNA.post2ndALVAC.24hours | -1.31 | 0.212    | IL10 positively regulates extracellular inflammatory mediators |
| IL1RN              |                                         |      |          | DNA.post1stALVAC.2weeks  | -1.35 | 0.197    | IL10 positively regulates extracellular inflammatory mediators |

Supplementary Table 4



| B Cell Responses<br>Week 27 |                                        | Mann Whitney<br>P Value | T Cell Responses<br>Week 27 |                            | Mann Whitney<br>P Value |
|-----------------------------|----------------------------------------|-------------------------|-----------------------------|----------------------------|-------------------------|
|                             | SERUM                                  | Ad26 > DNA              |                             | BLOOD                      | Ad26 > DNA              |
|                             | bAb IgG mac251 (EC50)                  | 0.0145                  |                             | Env m766 ICS CD4 IFN-g     | ns                      |
|                             | bAb IgG E660 (EC50)                    | ns                      |                             | Env m766 ICS CD4 TNF-a     | ns                      |
|                             | bAb IgG V1V2 mac251 WY (EC50)          | ns                      |                             | Env m766 ICS CD4 IL-2      | 0.0387                  |
|                             | bAb IgG V1V2 E660 BR (EC50)            | ns                      |                             |                            |                         |
|                             | bAb IgA 251 (MFI)                      | 0.0861                  |                             | Gag m766 ICS CD4 IFN-g     | 0.0101                  |
|                             | bAb IgA E660 (MFI)                     | 0.0003                  |                             | Gag m766 ICS CD4 TNF-a     | 0.0279                  |
|                             | Titers IgG mac251 cyclic V2            | ns                      |                             | Gag m766 ICS CD4 IL-2      | 0.0141                  |
|                             | Titers IgG E543 cyclic V2              | ns                      |                             |                            |                         |
|                             | Titers IgA mac251 cyclic V2            | ns (0.078)              |                             | Env m766 ICS CD8 IFN-g     | ns                      |
|                             | Titers IgA E543 cyclic V2              | ns (0.068)              |                             | Env 766 ICS CD8 TNF-a      | ns                      |
|                             | RECTUM                                 |                         |                             | Env m766 ICS CD8 IL2       | ns                      |
|                             | nAb DM SIVmac251 Stock                 | ns                      |                             | Gag m766 ICS CD8 IFN-g     | 0.0006                  |
|                             | nAb DM SIVmac251 Tier 1                | 0.0067                  |                             | Gag m766 ICS CD8 TNF-a     | 0.0076                  |
|                             | Specific activity mac251 gp130         | < 0.0001                |                             | Gag m766 ICS CD8 IL-2      | 0.001                   |
|                             | Specific activity E660 gp130.          | < 0.001                 |                             | BAL                        |                         |
|                             | Specific activity V1V2 mac251          | < 0.001                 |                             | Env IL-2 CD8 <sup>-</sup>  | 0.021                   |
|                             | Specific activity V1V2 E660            | < 0.001                 |                             | Env TNF-a CD8 <sup>-</sup> | ns                      |
|                             |                                        | Ad26 = DNA              |                             | Env IFN-g CD8 <sup>-</sup> | ns                      |
|                             | Specific activity IgG mac251 cyclic V2 | ns (0.078)              |                             | Env CD107 CD8 <sup>-</sup> | ns                      |
|                             | Binding IgG E543 cyclic V2             | ns (0.068)              |                             | Env IL-17 CD8 <sup>-</sup> | 0.045                   |
|                             | Binding IgA E543 cyclic V2             | ns (0.504)              |                             | Env IL-2 CD8 <sup>+</sup>  | ns                      |
|                             | Binding IgA mac251 cyclic V2           | ns (0.417)              |                             | Env TNF-a CD8 <sup>+</sup> | ns                      |
|                             |                                        |                         |                             | Env IFN-g CD8 <sup>+</sup> | ns                      |
|                             |                                        |                         |                             | Env CD107 CD8 <sup>+</sup> | ns                      |
|                             |                                        |                         |                             | Env IL-17 CD8 <sup>+</sup> | 0.0092                  |

Supplementary Table 5

|           | ALVACgpe       | Ad26gpe       | MVAgpe       |
|-----------|----------------|---------------|--------------|
| IFNalpha  | < 1.5          | nd            | < 1.5        |
| IL-2      | 1.5 – 2        | < 1.5         | < 1.5        |
| TNF-alpha | <b>10 – 50</b> | < 1.5         | < 1.5        |
| IFN-gamma | < 1.5          | 1.5 – 2       | < 1.5        |
| IP10      | 1.5 – 2        | <b>5 – 10</b> | <b>2 – 5</b> |
| IL-5      | 1.5 – 2        | < 1.5         | < 1.5        |
| IL-6      | <b>&gt; 50</b> | <b>2 – 5</b>  | 1.5 – 2      |
| TGF-alpha | <b>2 – 5</b>   | < 1.5         | < 1.5        |
| IL-10     | <b>10 – 50</b> | nd            | < 1.5        |
| IL-17     | < 1.5          | < 1.5         | < 1.5        |
| IL-12/23  | < 1.5          | < 1.5         | < 1.5        |
| IL-8      | < 1.5          | < 1.5         | < 1.5        |
| IL-1b     | <b>&gt; 50</b> | < 1.5         | < 1.5        |
| IL-1Ra    | <b>10 – 50</b> | <b>5 – 10</b> | < 1.5        |
| MIP-1beta | <b>5 – 10</b>  | < 1.5         | < 1.5        |
| CCL2      | 2 – 5          | < 1.5         | < 1.5        |
| VEGF      | <b>5 – 10</b>  | < 1.5         | < 1.5        |

Supplementary Table 6
